1 Seed sourcing for climate-resilient grasslands: the role of seed source diversity during early  
2 restoration establishment

3 Running Head: Seed source diversity in restoration establishment

4 Jessica Lindstrom<sup>1,4</sup>, Marissa Ahlering<sup>2</sup>, Jill Hamilton<sup>1,3</sup>

5 <sup>1</sup>North Dakota State University, <sup>2</sup>The Nature Conservancy, <sup>3</sup>Pennsylvania State University

6 <sup>1</sup>Department of Biological Sciences, North Dakota State University, Fargo, ND 58102, USA

7 <sup>2</sup>The Nature Conservancy, 1101 West River Parkway, Suite 200, Minneapolis, MN 55415, USA

8 <sup>3</sup>Department of Ecosystem Science and Management, Pennsylvania State University, State  
9 College, PA 16801, USA

10

11 <sup>3</sup>Corresponding Author: Email: [jvh6349@psu.edu](mailto:jvh6349@psu.edu)

12 Author Contributions: MA, JH, and JL conceived and designed the research; JL performed the  
13 experiments; JL analyzed the data; JL, MA, JH wrote and edited the manuscript.

14

15

16

17 ABSTRACT

18 Restoration often advocates for the use of local seed in restoration, however increasingly  
19 new strategies have been proposed to incorporate diverse sources to maintain evolutionary  
20 potential within seed mixes. Increasing seed sources per species within a seed mix should  
21 increase genetic variation, however, few empirical studies have evaluated how seed source  
22 diversity impacts plant community composition following restoration. Thus, the goal of this  
23 research was to compare the use of single or multi-source seed mix treatments to plant  
24 community diversity following restoration. Using 14 species commonly applied in grassland  
25 restoration, we examined plant community diversity following restoration comparing seed mixes  
26 with either one or five sources per species across two restoration sites in Minnesota and South  
27 Dakota, United States. Following seeding, species establishment and abundance were recorded to  
28 calculate plant diversity for each seed mix treatment. There were no major effects of seed mix  
29 treatment on community emergence and diversity observed, with the majority of plant  
30 establishment reflecting non-seeded species. However, site-specific differences were observed.  
31 Heterogeneous land-use history associated with the Minnesota site likely contributed to  
32 differences across the restoration treatments. In contrast, community diversity at the South  
33 Dakota site was homogeneous across seed mix treatments with changes in plant community  
34 influenced solely by early season species establishment. This suggests land-use history  
35 irrespective of seed mix treatment influences establishment and persistence, particularly in the  
36 first year following restoration. Future monitoring across seasons will be needed to evaluate if  
37 community diversity changes in response to seed mix treatment.

38

39 KEYWORDS: Grassland restoration, plant diversity, emergence, seed mix, species richness,  
40 genetic variation

## 41 INTRODUCTION

42           One of the major aims of ecological restoration is to restore or re-establish functional  
43 plant species diversity to ensure key ecosystem services are maintained (Barr et al. 2017;  
44 Montoya et al. 2012). To ensure ecosystem health and the maintenance of productive plant  
45 communities, this includes creating diverse seed mixes for application in restoration (Tilman et  
46 al. 1996, 1997, 2001; Brudvig 2011). These seed mixes create communities that may be resilient  
47 to changes in nutrient availability (Craven et al. 2016), competition from non-natives (Funk et al.  
48 2008; Oakley & Knox 2013; Yurkonis et al. 2012; Norland et al. 2013), and climate change  
49 (Isbell et al. 2015). Evolutionary theory emphasizes the important role both inter- and  
50 intraspecific variation established within seed mixes may have to restoration success over time  
51 (McKay et al. 2005). Greater biodiversity within restoration communities may increase total  
52 plant productivity across time leading to increased stability in soil nutrient availability (Craven et  
53 al. 2016), and resilience to extreme events (Isbell et al. 2015). In addition, intraspecific variation  
54 is essential as this may provide the raw material that natural selection may act upon and is  
55 needed to maintain species' evolutionary potential (Pizza et al. 2021; McKay et al. 2005).  
56 Despite the importance of intraspecific diversity to restoration success, few studies have  
57 quantified the role diversity within species has to restoration outcomes (Hamilton et al. 2020).  
58 Consequently, to ensure that plant communities persist over time and in response to change,  
59 there is a need to consider both the role of within and between species diversity to restoration.

60           Current strategies used to establish seed mixes often advocate a 'local is best' approach  
61 (Broadhurst et al. 2008; McKay et al. 2005). This approach assumes that local seed sources will  
62 have greatest fitness in local restoration environments relative to non-local sources (Kawecki &  
63 Ebert 2004; Hoban et al. 2016). While there is evidence of local adaptation for many plant

64 species (Leimu et al. 2010; Hereford 2009), the degree or scale of adaptation is often unknown  
65 (McKay et al. 2005). Furthermore, to conserve evolutionary potential requires genetic variation  
66 (Kawecki & Ebert 2004). Genetic diversity is the raw material that selection acts upon and is  
67 necessary for adaptation to changing environmental conditions. Genetic variation may be lost  
68 through random fluctuations in population size via genetic drift, but maintained through gene  
69 flow among populations (Reed & Frankham 2003). In addition, small, isolated plant populations  
70 that exhibit reduced connectivity or gene flow may exhibit reduced genetic variation, but  
71 increased genetic differentiation (Durka et al. 2017). If seeds are sourced locally for restoration  
72 from small, isolated populations then individual seed sources may not have the requisite genetic  
73 variation needed to adapt to change (Davis et al. 2005; Etterson & Shaw 2001). To ensure the  
74 maintenance of evolutionary potential therefore may require seed sourcing strategies that  
75 increase genetic diversity. Accounting for the role evolutionary forces play in the maintenance of  
76 diversity will aid in establishing seed mixes that ultimately increase restoration success  
77 (Bucharova et al. 2017; Hamilton et al. 2020).

78         To ensure preservation of evolutionary potential, variation within species is required  
79 alongside the establishment of species rich seed mixes. The combination of intraspecific and  
80 interspecific species diversity can influence community composition during establishment  
81 (Larson et al. 2013). Diversity at these two scales can impact short-term response to the  
82 environment and competition with local seed banks (Grman et al. 2013). During the first few  
83 years following restoration it is expected that communities will be largely dominated by non-  
84 seeded weedy species typically found within the soil seed bank (Bakker et al. 1996). For  
85 example, when comparing an active prairie restoration to multiple remnant prairies, Martin et al.  
86 (2005) observed more non-native species present within the restoration, with the overall

87 proportion of non-natives ranging from 236% to 413% higher in the restoration relative to  
88 remnant sites. Thus, considering early establishment of seeded relative to non-seeded species  
89 may be important to predicting longer-term plant community composition. Despite the potential  
90 importance of early establishment to long-term restoration success, this phase is often  
91 overlooked in favor of evaluating restorations after they have been established for several years.

92 Globally, native grasslands remain one of the most critically imperiled ecosystems  
93 requiring active restoration (Hoekstra et al., 2005). These ecosystems provide essential services,  
94 including maintenance of hydrological flow and retention (Seeling & DeKeyser 2006), carbon  
95 sequestration (Euliss et al. 2006), nutrient cycling, and habitat for a diversity of species (Helzer  
96 & Jelinski 1999; Skagen et al. 2008). Throughout the North American Great Plains, up to 87% of  
97 historical grassland habitat has been lost primarily to agricultural conversion (Comer et al. 2018;  
98 Hoekstra et al. 2005; Samson et al. 1999) leading to highly fragmented and isolated remnant  
99 habitats. Where these grasslands remain, they are prone to invasion by non-native species and the  
100 evolutionary consequences of isolation, which has lasting negative effects to diversity and  
101 species richness (DiAllesandro et al. 2013; Haddad et al. 2015). Ensuring seed mixes restore  
102 grassland populations so they have the capacity to adapt to change, resist invasion, and persist  
103 over time is critical. However, the role of intraspecific diversity within seed mixes to restoration  
104 success has yet to be empirically evaluated. Therefore, it is necessary to consider the impact of  
105 both species and population diversity within seed mixes has to establishment of grassland  
106 restorations.

107 We assessed plant community diversity following restoration using single- and multi-  
108 source seed mixes to test the role within-species seed source diversity played in community  
109 establishment. We used seed collected from five unique populations for each of 14 different

110 species as a proxy for creating genetic diversity within a seed mix. We expected that increasing  
111 the number of unique seed sources per species used within a seed mix would lead to increased  
112 emergence diversity following restoration relative to the use of a single seed source seed mix  
113 (Bucharova et al. 2018). Overall, we predicted greater within-species diversity for seed mixes  
114 would lead to increased species diversity in restored plant communities. This research  
115 empirically evaluates the role of within species to between species diversity following  
116 restoration. This study will provide a baseline understanding of the role of diversity across scales  
117 to establishment during restoration.

## 118 METHODS

### 119 *Seed Collection*

120 In the summer of 2019, seed from 12 forb and two grass species were collected between  
121 June and October from remnant native prairies within the Northern Great Plains of the United  
122 States. A minimum of five unique populations per species each were collected from the Missouri  
123 Coteau region of North and South Dakota and from the northwestern prairie region of Minnesota  
124 (Table 1, Fig. 1). These 14 species were chosen because they are widely distributed throughout  
125 the Northern Great Plains and are commonly used in regional restoration seed mixes (e.g., Smith  
126 2010; Kurtz 2013). In addition, to control for potential dominance of warm-season grasses and to  
127 increase establishment of sown forbs, species chosen were weighted toward forb species  
128 (McCain et al. 2010; Norland et al. 2013; Dickson & Busby 2009). Populations were classified  
129 as distinct if separated by at least one mile, however, were more commonly spaced further apart.  
130 In northwestern MN, distances between seed source locations ranged from 3 km to 215 km  
131 (Table S2), and pairwise distances between the restoration site and seed source ranged from 2 km  
132 to 129 km (Table S3). Within the Missouri Coteau region, distances between seed source

133 locations ranged between 2 km and 312 km (Table S4), and pairwise distances between the  
134 restoration site and seed source site ranged from 3.5 km to 214 km (Table S5).

135 Seed was hand-harvested as it ripened, with seed harvested multiple times at different  
136 sites throughout the growing season following Bureau of Land Management seed harvesting  
137 guidelines (BLM 2015). Within each population, individual maternal seed heads were sampled at  
138 least three feet apart to reduce potential relatedness within populations. For species with multiple  
139 seed heads, no more than 30% of available seed per maternal seed head was collected.

#### 140 *Seed Mix Preparation*

141 Following harvest, seeds were dried at room temperature for a minimum of two weeks and  
142 then transferred to 4°C storage for seven months to provide cold stratification and maintain  
143 viability. Seeds were cleaned using several species-specific approaches. Large seeds were  
144 stripped by hand, smaller seeds separated using sieves, *Hesperostipa comata* (Needle and thread  
145 grass) seed awns were trimmed during the drying process to limit tangling, and *Solidago rigida*  
146 (Stiff Goldenrod) and *Helianthus maximiliani* (Maximilian sunflower) and *H. pauciflorus* (Stiff  
147 sunflower) seed were mechanically cleaned and separated using a Fractioning Aspirator Test  
148 Model at the USDA Agricultural Research Center in Fargo, ND.

149 Seed was weighed for each species (Mettler Toledo, ML503T/00) from each population to  
150 calculate population-specific numbers of seeds using a seeds per gram conversion (Table S1). To  
151 maximize the seeds per species in the mix and ensure seed mix consistency across treatments and  
152 replicates, the amount of seeds to include in the mix per species was calculated based on the  
153 population with the lowest seed weight (g). In addition, for *Artemisia fringida* (Fringed  
154 sagewort), *H. pauciflorus*, and *S. rigida*, the amount of seeds used in the seed mixes was reduced



155 by 0.9%, 3.5-7.0%, and 4.4-6.0% of the lowest seed weight respectively, to ensure these species  
156 were not overrepresented in seed mixes as they can exhibit dominant characteristics (Table 1).

157 Across the two regions, seed mixes were established using the same species with the  
158 exceptions of *A. fringida*, *Anemone cylindrica* (Tall tibbleweed), and *Schizachyrium scoparium*  
159 (Little bluestem), which were collected and planted exclusively in the northwestern MN region  
160 and *Ratibida columnifera* (Prairie coneflower), *H. comata*, *Bouteloua gracilis* (Blue grama),  
161 which were collected and planted exclusively in the Missouri Coteau region. Five different seed  
162 mixes were established each using a single unique population per species for the seed mix within  
163 each of the two restoration regions. For these single-source seed mixes, populations for the  
164 different species were largely sourced from similar latitudes to minimize potential impacts  
165 associated with latitudinal variation in phenology (Olsson & Ågren 2002; Dunnell & Travers  
166 2011) (Fig. 1). In addition to five single source seed mixes, one multiple-source seed mix was  
167 established for each region. The multi-source seed mix used proportionally the same amount of  
168 seeds per species as the single-source mix, but each species' contribution was divided evenly  
169 across five population sources. Thus, for both single and multi-source seed mixes the proportion  
170 of seed used per species was the same. In this way, the ratio of species present within the single  
171 source and multi-source was maintained across seed mixes for direct comparison. Vermiculite  
172 (Vigoro) was added to final seed mixes in a 1:1 ratio as a common method to increase seed to  
173 soil contact during planting and thus increase probability of emergence (Shaw et al. 2020).

#### 174 *Seed Viability*

175 Unused seed from the restoration plots sampled from the northwestern MN region were sent  
176 to South Dakota State University's Seed Testing Laboratory to assess seed viability. Unused seed

177 from the Missouri Coteau were not available for seed viability testing. These tests evaluated the  
178 total viability of individual species when grown under ideal laboratory growth conditions to  
179 induce germination. This test reported the percent of seed that germinated defined as the total  
180 number of individuals emerged per seeds planted, percent of hard seed defined as seed that is  
181 dormant due to a water impervious seedcoat, and dormant seed which is defined as seed that is  
182 viable but does not germinate due to a physical or physiological condition (SDSU Seed Testing  
183 Laboratory; [https://www.sdstate.edu/sites/default/files/file-archive/2021-07/Seed-Testing-  
184 Lab.pdf](https://www.sdstate.edu/sites/default/files/file-archive/2021-07/Seed-Testing-Lab.pdf)).

#### 185 *Restoration Sites and Site Preparation*

186 During May and June of 2019, experimental restoration sites were identified and prepped  
187 in both the northwestern MN and Missouri Coteau regions. The northwestern MN restoration site  
188 was established at the Minnesota State University Moorhead Regional Science Center (RSC)  
189 (46.872, -96.452) in Glyndon, MN. Portions of this site are abandoned agricultural brome fields  
190 that are adjacent to remnant mesic prairie owned by Buffalo River State Park. Another portion of  
191 this site was actively maintained as the Ponderosa golf course starting in 1962 and continued  
192 operation after the transfer of ownership until May 2015, following which limited mowing  
193 management has occurred. Due to site and space limitations, both areas of this site were used to  
194 establish the experimental plots. The Missouri Coteau restoration site was established on the  
195 Samuel H. Ordway Prairie Preserve (ORD) (45.704 -99.086), owned and managed by The  
196 Nature Conservancy (TNC). Prior to TNC ownership in 1978, this site was used as a  
197 brome/alfalfa production plot for cattle. Since TNC's ownership, this site has been maintained  
198 for hay production every other year.

199 In 2019, the RSC site was prepared by placing landscape cloth over experimental  
200 restoration plots to remove existing vegetation and limit potential establishment and competition  
201 with the existing seedbed prior to applying the restoration treatment. In fall 2019, the ORD site  
202 was treated with herbicide prior to application of restoration treatment (Roundup®, 3-4%  
203 concentration) within each plot to reduce competition with existing weedy vegetation during  
204 establishment. Additionally, all plots had a second Roundup treatment in early May, 2020 to  
205 further reduce *Bromus inermis* (Smooth brome) encroachment.

206 At each site, twenty 3 x 3m experimental restoration plots were established. This included  
207 establishment of five different single source seed treatment plots each replicated three times  
208 (n=15) and one multi-seed source treatment replicated five times (n=5). For each individual  
209 replicated plot within a seed treatment, a barrier of 3m was maintained and a minimum 100m  
210 buffer maintained between each single- and multi-source seed treatment group to limit potential  
211 gene flow between plots.

#### 212 *Planting Experimental Restoration Treatments*

213 To establish the restoration treatments, tarps were removed from the plots at the RSC site,  
214 and litter was raked and hand weeded in April 2020 at both sites to expose the seed bed.  
215 Following this, each plot was broadcast seeded and then raked again to increase seed-soil  
216 contact. For both sites, five times the total commonly recommended seeding rate of ~5kg (11  
217 pounds) of seeds per acre were applied to increase probability of emergence success (Rowe  
218 2010). Higher seeding rates were applied as these rates have previously been associated with  
219 increased establishment and diversity following restoration (Sheley & Half 2006; Barr et al.  
220 2017). An agri-fab push lawn roller was used to increase seed to soil contact and enhance the  
221 probability of germination success. To limit potential carryover of seeds between seed treatments

222 the roller was rinsed and dried between each application. Finally, each plot received a one-time  
223 watering treatment. Throughout the growing season, plot maintenance included weekly barrier  
224 mowing around each plot. In July, mid-season mowing was performed at both sites to increase  
225 light availability and reduce competition with non-seeded species (Maron & Jefferies 2001; Kaul  
226 & Wilsey 2020). Plots were mowed at the maximum adjustable height setting (12.7cm) and all  
227 trimmings were removed.

### 228 *Data Collection*

229 Each restoration plot was visited once per month at both sites between June and  
230 September of 2020 to assess plant community composition. A 0.2m x 0.2m quadrat randomly  
231 placed at each of the four cardinal corners and center of each replicated experimental plot was  
232 used to estimate community composition of the broader restoration plot. To reduce the impact of  
233 edge effects, quadrats were not placed directly at the edges of each plot. For all species present in  
234 the quadrat, we counted the number of individuals present and estimated the percent cover per  
235 species. Individuals that were unidentifiable in the field were marked with unique toothpicks and  
236 photographed for later identification. There were two unknown species at the RSC site and three  
237 at the ORD site that did not match planted species seedlings and were unable to be identified.  
238 These species were uniquely labeled as unknowns and included in diversity calculations as  
239 unique non-seeded species. Total percent cover of dead vegetation and percent bare soil cover  
240 was also assessed visually within the quadrat. At the quadrat-level, total species coverage was  
241 recorded as the total percent coverage of each species, litter coverage was the percent cover of  
242 dead matter covering the ground, and soil coverage was the percent of visible bare ground. Each  
243 coverage estimate was assessed with a modified Daubenmire cover-class system for grassland

244 vegetation (Table S6; Daubenmire 1959) and averaged across quadrats to obtain replicate-level  
245 percent coverages for each seed mix treatment.

### 246 *Statistical Analysis*

247 To infer plant productivity and assess plant community composition following  
248 restoration, species diversity metrics such as richness, evenness, abundance, and associated  
249 diversity indices are often used and may be monitored over time (Martin et al. 2005; Polley et al.  
250 2003). We tested for differences in community composition based on seed mix treatment at each  
251 of our restoration sites using measures of species richness and diversity. Species richness was  
252 defined as the total number of species present across all five quadrats sampled per replicate and  
253 abundance as the total number of individuals present per species across quadrats. We also  
254 analyzed the total number of unique species and the number of seeded species that established  
255 within seed treatments for replicated plots. To evaluate our seed treatment communities  
256 regardless of planted or non-seeded species status, we calculated Shannon's Diversity Index ( $H'$ )  
257 for each seed treatment and each replicate plot across time from June to September.

$$258 \quad H' = \sum_{i=1}^s p_i \ln p_i$$

259 Where  $s$  is the total number of species within the community (richness),  $p_i$  is the proportion of  
260 each species ( $i$ ) within the community relative to the total number of species multiplied by the  
261 natural logarithm and summed across all species to get a value between 0-1. Values closer to 0  
262 indicated lower diversity and values closer to 1 indicated higher diversity. We used Shannon's  
263 Diversity for our data as it was the most appropriate given our data collection approach  
264 (Magurran 2004). Diversity indices were calculated at the seed treatment level and for the  
265 individual replicates within seed treatment to create distance matrices.

266 To compare plant community diversity within each restoration site for varying seed  
267 treatments across time we used non-metric multidimensional scaling (NMDS) in three  
268 dimensions with a Bray—Curtis dissimilarity distance matrix which was derived from the  
269 Shannon’s diversity indices for each seed treatment and each month of data collection. We used  
270 NMDS because it uses an ordination approach where community data is summarized on two-  
271 axes and communities that are more similar cluster together (Ruiz-Jaen & Aide 2005).

272 To evaluate differences between community compositions, we performed permutational  
273 ANOVAs (PERMANOVAS) on the same Shannon’s diversity values for seed treatment  
274 communities across each month, using the adonis function in package “vegan” (Oksanen et al.  
275 2020). We used a PERMANOVA approach to evaluate differences between individual seed  
276 treatments and more broadly between single source and five-source community diversity. Seed  
277 treatment, replicate, month, and the interaction of seed treatment and month were predictor  
278 variables and the percent bare ground and thatch were included as random-effect variables within  
279 our models. Post-hoc pairwise comparisons were performed to evaluate differences between seed  
280 mix treatment per month for RSC communities and by month for ORD communities within the  
281 pairwise.adonis function in package “pairwiseAdonis” (Martinez Arbizu 2019). All analyses  
282 were conducted in R version 4.0.2 (R Core Team 2016).

283

## 284 RESULTS

### 285 *Seed Viability*

286 Six of the 14 species sent for testing had enough seed for an assessment of viability.  
287 Variability in seed viability may impact how individual species may or may not establish within

288 the first year following restoration. Seeds from *Amorpha canescens* exhibited a viability score of  
289 20% with 16% of seed reaching germination, 4% labeled as hard seed, and 0% dormant seed.  
290 Seeds from *Anemone cylindrica* exhibited 82% viability with 75% of seed reaching germination,  
291 0% hard seed and 7% assessed as dormant. Seeds from *Artemisia fringida* were 62% viable, with  
292 25% of seed reaching germination, 0% labeled as hard seed, and 37% dormant seed. *Geum*  
293 *triflorum* seed had a total viability of 47% with 47% of seed reaching germination, 0% labeled as  
294 hard seed, and 0% dormant seed. *Potentilla arguta* seed exhibited 88% viability, with 66% of  
295 seed reaching germination and 0% labeled as hard seed, 22% dormant seed. Finally, *Solidago*  
296 *rigida* seeds had a viability score of 54% with 44% of seed reaching germination, 10% labeled as  
297 hard seed, and 10% dormant seed.

#### 298 *Plant Community Structure following Restoration*

299 Seed mix application at both the RSC and ORD sites resulted in a mixture of seeded and  
300 non-seeded species emergence. At the RSC site, seeded species emerged from all plots excluding  
301 seed treatment ‘D’ in the first growing season. Of seed mix treatment types, the multi-source  
302 seed mix type ‘ABCDE’ had the greatest number of seeded species emerge, including *Echinacea*  
303 *angustifolia*, *Helianthus maximilani*, and *Verbena hastata*. Across all seed treatments at the RSC  
304 site, *Helianthus maximilani* exhibited the greatest rate of emergence, followed by *Liatris*  
305 *punctata*. In the first year of observation, in total only five of the seeded species established at  
306 the RSC site. At the ORD site, seeded species emerged within all plots in the first growing  
307 season. Of seed mix treatment types, the multiple-source seed mix type ‘ABCDE’ and the single-  
308 source seed treatment ‘C’ had the greatest number of seeded species emerge, including *H.*  
309 *maximiliani*, *S.rigida* which were found within every seed treatment, followed by *Ratibida*

310 *columnifera*, and *Dalea purpurea*. In total only six unique seeded species established at the ORD  
311 site.

312 At both restoration sites, seed treatment plots were largely dominated by non-seeded  
313 species (Fig. 2.) At the RSC site the most common species within our experimental restoration  
314 plots were *Ambrosia psilostachya* (Western Ragweed), *Melilotus sp.* (Sweetclover sp.), *Panicum*  
315 *capillare* (Witchgrass), *Poa pratensis* (Kentucky Bluegrass), *Oxalis stricta* (Yellow Wood  
316 Sorrel), *Trifolium repens* (White Clover). At the ORD site the most common species within our  
317 experimental restoration plots were *A. absinthium*, *Bromus inermis* (Smooth Brome), and *P.*  
318 *pratensis*.

319 To evaluate plant community-level differences between seed mix treatment types and  
320 across the growing season, we used a PERMANOVA based on Shannon's Diversity.  
321 Additionally, to visualize any differences in these plant communities we used an NMDS with  
322 Bray–Curtis dissimilarity. Within the RSC site, we found significant community-level  
323 differences based on seed mix treatments (pseudo- $F= 18.268$ ,  $p = 0.001$ ); plot replicate (pseudo-  
324  $F=7.868$ ,  $p = 0.001$ ), month (pseudo- $F= 2.677$ ,  $p = 0.018$ ), and the interaction of seed treatment  
325 and month (Pseudo- $F= 2.172$ ,  $p = 0.008$ ; Table 2). However, as very few seeded species  
326 established across seed mix treatments, the differences observed appear to be largely driven by  
327 site-level differences associated with spatial heterogeneity in the presence of non-seeded species  
328 (Fig. 3B). To then evaluate which seed treatments, or location of seed treatments within the RSC  
329 site were compositionally different, we then performed individual pairwise analyses. Pairwise  
330 comparisons evaluating community compositions differences across seed mix treatments were  
331 subset by month to account for the significant interaction of seed treatment and month found  
332 within our PERMANOVA results. From these comparisons we found the five-source seed



333 treatment was significantly different from all single-source seed treatments across all months  
334 with the sole exception of seed source 'E, which became more similar to the five-source  
335 treatment over time (Table S7). This follows our expectation that the multiple-source treatment  
336 would produce a more diverse community when compared to single-source treatments; however,  
337 with the caveat that differences observed seem to be driven largely by the diversity of non-  
338 seeded species present within individual plots.

339         Within the ORD experimental restoration site, we found no significant community-level  
340 differences between seed mix treatments. However, within our PERMANOVA of community  
341 composition based on Shannon's Diversity Index, we observed a significant difference among  
342 our ORD communities based on month alone (pseudo- $F=0.385$ ,  $p<0.001$ ; Table 3). These results  
343 indicate that any differences in community diversity was not due to seed mix treatments but were  
344 primarily explained by the growing season (Fig. 3A). Pairwise comparisons found that plant  
345 community composition in June was significantly different from the later seasonal communities  
346 in August and September (Table S8). These results suggest that community diversity observed  
347 across the restoration site was different in June than was observed later in the season.

## 348 DISCUSSION

349         Current local seed sourcing approaches during restoration may not adequately incorporate  
350 within species genetic diversity needed to re-establish functional plant communities for  
351 adaptation to changing environmental conditions. Thus, establishing diversity within and  
352 between species for seed mixes will be critical to ensuring restoration success. Using seed source  
353 as a proxy to indicate increased genetic variation, we have empirically evaluated how community  
354 diversity establishes following the use of single and multiple- source seed mix treatments. There

355 was no major effect of seed mix treatment type on increasing community diversity within the  
356 first year following restoration at two sites. However, community diversity across seed mix  
357 treatment types at this early stage following restoration was strongly influenced by spatial  
358 heterogeneity and by the growing season across the RSC restoration site, and strongly influenced  
359 by time at the ORD site. Community diversity within both sites was largely dominated by non-  
360 seeded species, with limited emergence of seeded species within the first year. These  
361 observations are consistent with previous restoration studies, which observed that non-seeded  
362 species may dominate restored environments during the first several years following restoration  
363 (Kaul & Wilsey 2020). Although no differences were observed in community diversity between  
364 our single and multiple-source seed mix treatments, our results suggest that first-year restoration  
365 communities are influenced by heterogeneity in a restoration site and temporally by the growing  
366 season. Thus, land-use history may be important in influencing plant establishment and  
367 persistence over time, particularly in the first year following restoration.

### 368 *Seed Viability*

369 Although non-seeded species were expected in the first year, variation in seed viability  
370 within our seed mixes (ranging from 20-88% for the RSC site) may have impacted first year  
371 emergence. For seed viability testing, 7-37% of seeds were considered “dormant” and therefore  
372 may have germinated within the first year, but could emerge in subsequent years provided that  
373 environmental conditions in the future are favorable for germination. In addition, seed predation  
374 and seedling herbivory may have reduced establishment success during the first year. Herbivore  
375 disturbance can mediate non-seeded species dispersal through selective seed herbivory on native  
376 plant species (Howe & Brown 2000) which may affect overall species diversity. At the  
377 northwestern MN site, the thirteen lined-ground squirrel (*Ictidomys tridecemlineatus*) was

378 observed, alongside nearby and within-plot gopher mounds. As our study design was aimed to  
379 mimic natural restoration practices, we did not take measures to actively exclude mammals from  
380 the restoration sites, but instead used approximately five times the standard seeding rate for each  
381 seed mix treatment type. High seeding rates are often used to mitigate potential effects of seed  
382 viability and herbivory on seedling establishment, and increase overall plant densities  
383 (Applestein et al. 2018).

#### 384 *Plant Community Structure following Restoration*

385 We compared species richness following restoration with seed mixes containing a single  
386 source per species or multiple sources per species across two restoration sites. Multi-source seed  
387 mixes were associated with greater seeded species richness at the RSC site, but not the ORD  
388 restoration site. In the first growing season following the restoration four times the number of  
389 non-seeded species were observed compared to seeded species at the ORD site, and seven times  
390 at the RSC site, respectively (Fig. 2). This is consistent with rates observed previously in  
391 grassland restoration experiments (Martin et al. 2005). Seeded species that emerged were those  
392 have evolved traits that provide competitive advantages in grassland ecosystems, such as  
393 rhizomatous root systems (Mangan et al. 2011; Dickson & Busby 2009) or mutualist fungal  
394 relationships which can promote and facilitate establishment (Busby et al. 2011). For example,  
395 *H. maximiliani* is a widespread perennial forb native to prairies in the United States and Canada  
396 (USDA). *H. maximiliani* readily established at both sites across seed treatments and is often  
397 found in remnant and restored prairies as a sub-dominant or dominant species (Dickson & Busby  
398 2009). Previous studies have found that *H. maximiliani* is often one of the most productive forb  
399 species within plant communities as it may outcompete other species due to its rhizomatous root  
400 system that creates a spreading pattern for nutrient uptake, and thick sprouting stem that leads to

401 increased biomass production and vegetative coverage (McKenna et al. 2019; Mangan et al.  
402 2011; Dickson & Busby 2009). *Ratibida columnifera* was another common perennial species to  
403 establish at the ORD site and across various seed treatments. This species occurs widely  
404 throughout southern Canada, across the US Great Plains, and into Northern Mexico (USDA). In  
405 previous experiments, *R. columnifera* has been observed to have high first year survival and a  
406 life span around three years and may negatively impact the abundance of other forbs (Lauenroth  
407 & Adler 2008; Dickson & Busby 2009). The competitive advantage expressed by *R. columnifera*  
408 may be due to its establishment through a prominent taproot and strong positive relationship with  
409 arbuscular mycorrhizal fungi which aids nutrient uptake and growth (Busby et al. 2011). In  
410 addition, both species are native to our study regions, thus may exist within the seed bank  
411 currently. However, during field site visits we did not observe *H. maximiliani* at either site  
412 outside of the experimental plots. *Ratibida columnifera* was present within the RSC site but was  
413 not included in the experimental seed mixes and was not present within the plots. Evaluating  
414 what species readily establish during the early stage of a restoration may aid in future seed mix  
415 design choices to combat non-native species establishment, and to ensure early restoration  
416 success.

417 Both the PERMANOVA and NMDS analyses assessed plant community structure using  
418 measures of diversity from seeded and non-seeded species quantified across seed mix treatments  
419 for each site. For RSC, the seed treatment with the most diverse community established  
420 throughout the season was our multiple-source mix (ABCDE). The multi-source seed treatments  
421 were planted on the portion of the site that was once a golf course, near a remnant mesic area  
422 with surrounding woody vegetation. Several species that established solely within this treatment  
423 were persistent within the woody vegetation nearby, including *Achillea millefolium*, *Plantago*

424 *major*, *P. annua*, and *Salix interior*. The presence of these species only within our multiple-  
425 source treatment plots is therefore likely influenced by the neighboring community, although as  
426 predicted this treatment had the most seeded species establish. This treatment was significantly  
427 different from all other seed mix treatments, except ‘E’ which was compositionally more similar  
428 during later seasonal months (Table S7). Given the spatial proximity of the ‘ABCDE’ and ‘E’  
429 treatments, similar communities likely arose due to local site conditions, including below ground  
430 nutrient resources and varying seed banks across the site. Community composition at RSC also  
431 varied over time in response to seed mix treatments (Table 2). However, the spatial differences  
432 observed in community composition were maintained throughout the growing season.

433         Although multi-source seed mixes were associated with greater sown species richness  
434 within the RSC plots, total sown species richness was greater across all ORD plots, but not  
435 different across seed treatments (Fig. 2). The increase in total seeded species richness could  
436 indicate there was less competition from non-seeded species which may allow for increased  
437 establishment, or seeded species already existed within the soil seed banks. Although seed  
438 treatment did not appear to influence sown species establishment within ORD plots, growing  
439 season influenced communities with similar community diversity establishing throughout the  
440 growing season (Fig. 3b). Pairwise comparisons of community diversity across time indicated  
441 that June was the only month that was significantly different from the community present in later  
442 months. This may indicate that early season emergence drives the formation of community  
443 structure across time. These data provide a baseline understanding of site-specific community  
444 diversity to monitor composition change over time and across seed treatments.

445         Comparison across sites suggests the different patterns of diversity and those factors that  
446 structure diversity across sites are likely associated with different land-use histories. The

447 experimental seed mix treatments at the ORD restoration site were established on an old  
448 agricultural field with active management for hay production. The site has experienced similar  
449 land-use history, which has likely largely homogenized the above and belowground plant  
450 community, currently dominated by smooth brome (*B. inermis*) and alfalfa (*Medicago sativa*).  
451 The influence of agricultural activity and dominance of smooth brome and alfalfa has also likely  
452 contributed to further homogenization of the associated seed bank, reducing richness and  
453 diversity of the non-seeded species community (Bekker et al. 1997). In contrast to the  
454 homogeneity observed at the ORD site, the land-use history at RSC was more heterogeneous,  
455 which may have contributed to spatial variation in plant community establishment across the site.  
456 Interestingly, while the ORD community structure did not exhibit differences associated with  
457 seed mix treatment, the RSC site did exhibit significant differences across seed mix treatments.  
458 Single-source seed treatments A, B, and C were established on a portion of the site that was once  
459 planted with brome and alfalfa for haying purposes. In contrast, seed treatments D, E, and the  
460 multiple-source mix ABCDE were established on a portion of the site that was a golf course up  
461 until 2015. Combined, land use history and varying impacts of the seed bank and nutrient profile  
462 across the site suggests there is substantial heterogeneity across the site that may have influenced  
463 emergence following application of seed treatments. Despite site preparation methods used to  
464 prevent non-seeded species establishing within plots these differences may be reflected in the  
465 site-level differences as opposed to seed mix application. Thus site-level differences are due to  
466 spatial heterogeneity within the soil seed bank and nutrient availability associated with land-use  
467 history impacting community establishment regardless of seed mix treatment.

468 Land use history can play an important role influencing how restoration communities  
469 establish over time (Cousins et al. 2009; Grman et al. 2013). Spatial heterogeneity across a

470 restoration site could influence soil nutrient resources across the site and the associated species  
471 that may persist within the seed bank (Ricklefs 1977; Bakker et al. 2003). Where greater nutrient  
472 loading is observed, increased competition and exclusion between seeded and non-seeded  
473 species for resources could be observed (Eskelinen et al. 2021; Stotz et al. 2019). Aggressive  
474 non-seeded species often outcompete natives along nutrient load gradients leading to a  
475 subsequent loss of available soil nutrient resources. This can have substantial impacts to native  
476 plant diversity both above and belowground (Stevens & Carson 2002; Wilson & Tilman 1993;  
477 Eskelinen et al. 2021). Thus, heterogeneity in the soil nutrients or lack thereof likely impacted  
478 how communities established at both sites, but data on emergence provide a baseline to monitor  
479 how patterns in community composition may change over time.

480         Although we were interested in which seeded species established within our seed mix  
481 treatments, non-seeded species may also be important components to consider when evaluating  
482 these experimental communities over time. In a previous study Kaul & Wilsey (2020) noted that  
483 non-seeded weedy species abundance was the strongest predictor of species richness and  
484 diversity in grassland restorations, regardless of the age of the restoration. The most common  
485 non-seeded species to establish within our communities were introduced species, including cool-  
486 season grasses *B. inermis* and *Poa pratensis*. These species typically outcompete natives for  
487 resources, including both nutrient and light availability (reviewed in D'Antonio & Meyerson  
488 2002). *Poa pratensis* establishes early in the spring before many native forbs, thus early  
489 establishment and the consequent increased growing season may provide a competitive  
490 advantage over native species (DeKeyser et al. 2015). *Bromus inermis* also establishes readily in  
491 the spring and is a commonly planted pasture grass that readily forms a quickly establishing  
492 monoculture through a rhizomatous root system (Stotz et al. 2019). The aggressive establishment

493 of *B. inermis* often leads to outcompeting and displacing native species which may lead to  
494 decreased plant diversity and community homogenization of a site when it becomes an  
495 established invader (Stotz et al. 2019; DiAllesandro et al. 2013). The prevalence of these well-  
496 known invasive species within our treatments, despite our pre-seeding site prep to limit non-  
497 seeded species establishment may indicate that more work is needed to successfully limit and  
498 manage their establishment during restoration. Considering how these species establish may be  
499 critical to restoration success as it may require more effort to shift these communities back to  
500 native species (Martin & Wilsey 2014). Additionally, genetic variation within seeded species  
501 used within seed mixes may mitigate some of the negative impacts of invasives. Genetic  
502 variation may increase the diversity of genotypes that establish increasing the probabilities of  
503 producing a self-sustaining, persistent population that can evolve over generations. Evaluating  
504 which non-seeded species establish and tracking their abundance in the early stages of a  
505 restoration will help guide restoration expectations and community management practices over  
506 time.

507         Single versus multiple source seed mix treatments did not have an impact on community  
508 composition diversity in the first year of restoration establishment. Our results suggest that early  
509 emergence and diversity within a plant community following restoration is largely influenced by  
510 land-use history. In addition, first-year emergence following restoration may be largely  
511 insensitive to seed mix type if non-seeded species in the seedbank are able to outcompete seeded  
512 species during establishment. Previous studies have shown that first year emergence positively  
513 influences seeded species abundance and richness several years following restoration (Applestein  
514 et al. 2018; Geaumont et al. 2019) Thus, while there is some evidence to suggest seed mix type  
515 may impact the diversity of established species, long-term assessments over multiple years will



516 be necessary to quantify the full impact of seed mix type has to community diversity and  
517 restoration success over time. Evaluating what seeded and non-seeded species establish in the  
518 first year of a restoration will help inform future restoration plans for long-term restoration  
519 success. Indeed, identifying those seeded species that may have the competitive ability to readily  
520 establish may be needed during the design of seed mixes, both identifying those species that  
521 should be included and the proportion of seed that may be necessary to maintain those species  
522 over time.

523           Understanding the role within and among population genetic variation has on native  
524 grassland restorations may have substantial implications to seed mix design recommendations.  
525 We assumed here that a multi-population seed mix reflects increased genetic variation, however,  
526 the degree to which population sources impact standing genetic variation within seed mixes  
527 remains to be tested. Future work should include a genetic analysis of populations in single and  
528 multi-source seed mixtures. Finally, although initial establishment results may be important to  
529 early restoration success, longer-term monitoring will be necessary to evaluate the impact seed  
530 mix treatment may have to community structure over time. Combined, genetic analysis and  
531 longer-term monitoring of seed mix treatments will provide information needed for land  
532 managers to establish seed sourcing guidelines critical to restoration in a changing environment.

### 533 ACKNOWLEDGEMENTS

534           We thank the dedicated staff and volunteers at the Samuel H. Ordway Prairie Preserve  
535 and Minnesota State University Moorhead Regional Science Center and summer field crews. We  
536 also thank The Nature Conservancy, US Fish & Wildlife Service, North and South Dakota Game  
537 & Fish, South Dakota School Trust Lands, and Minnesota Department of Natural Resources for

538 access to survey sites and seed collection. We are grateful to J. Waraniak and J. Braasch for  
539 statistical help, and to R. Hedlund for conducting vegetation surveys in South Dakota. Funding  
540 was provided by the Clean Water Land & Legacy Amendment, Doris Duke Charitable  
541 Foundation, Prairie Pothole Joint Venture, Wildlife Conservation Society's Climate Adaptation  
542 Fund, and The Nature Conservancy. The authors declare no conflict of interest. Data  
543 accessibility will be provided.

544

#### 545 Literature Cited

546 Applestein C et al. (2018) Evaluating Seeding Methods and Rates for Prairie Restoration.  
547 *Natural Areas Journal* 38:347–355

548 Bakker JD et al. (2003) Contingency of grassland restoration on year, site, and competition from  
549 introduced grasses. *Ecological Applications* 13:137–153

550 Barr S, Jonas JL, Paschke MW (2017) Optimizing seed mixture diversity and seeding rates for  
551 grassland restoration. *Restoration Ecology* 25:396–404

552 Broadhurst LM et al. (2008) Seed supply for broadscale restoration: Maximizing evolutionary  
553 potential. *Evolutionary Applications* 1:587–597

554 Brudvig LA (2011) The restoration of biodiversity: Where has research been and where does it  
555 need to go? *American Journal of Botany* 98:549–558

556 Bucharova A et al. (2017) Genetic differentiation and regional adaptation among seed origins  
557 used for grassland restoration: lessons from a multispecies transplant experiment. *Journal of*  
558 *Applied Ecology* 54:127–136

559 Busby RR et al. (2011) Early seral plant species' interactions with an arbuscular mycorrhizal  
560 fungi community are highly variable. *Applied Soil Ecology* 48:257–262

561 Cousins SAO, Lindborg R, Mattsson S (2009) Land use history and site location are more  
562 important for grassland species richness than local soil properties. *Nordic Journal of Botany*  
563 27:483–489

564 Craven D et al. (2016) Plant diversity effects on grassland productivity are robust to both nutrient  
565 enrichment and drought.

- 566 D'Antonio C, Meyerson LA (2002) Exotic plant species as problems and solutions in ecological  
567 restoration: A synthesis. *Restoration Ecology* 10:703–713
- 568 Daubenmire R (1959) Canopy coverage method of vegetation analysis. *Northwest Science*  
569 33:43–64
- 570 Davis MB, Shaw RG, Etterson JR (2005) Evolutionary responses to changing climate. *Ecology*  
571 86:1704–1714
- 572 DeKeyser ES, Dennhardt LA, Hendrickson J (2015) Kentucky bluegrass ( *Poa pratensis* )  
573 Invasion in the Northern Great Plains: A Story of Rapid Dominance in an Endangered  
574 Ecosystem . *Invasive Plant Science and Management* 8:255–261
- 575 DiAllesandro A, Kobiela BP, Biondini M (2013) Invasion as a Function of Species Diversity: A  
576 Case Study of Two Restored North Dakota Grasslands. *Ecological Restoration* 31:186–194
- 577 Dickson TL, Busby WH (2009) Forb species establishment increases with decreased grass  
578 seeding density and with increased forb seeding density in a Northeast Kansas, U.S.A.,  
579 experimental prairie restoration. *Restoration Ecology* 17:597–605
- 580 Durka W et al. (2017) Genetic differentiation within multiple common grassland plants supports  
581 seed transfer zones for ecological restoration. *Journal of Applied Ecology* 54:116–126
- 582 Eskelinen A et al. (2021) Vulnerability of grassland seed banks to resource-enhancing global  
583 changes.
- 584 Etterson JR, Shaw RG (2001) Constraint to adaptive evolution in response to global warming.  
585 *Science* 294:151–154
- 586 Funk JL et al. (2008) Restoration through reassembly: plant traits and invasion resistance. *Trends*  
587 *in Ecology and Evolution* 23:695–703
- 588 Geaumont BA, Norland J, Stackhouse JW (2019) The influence of species richness and forb seed  
589 density on grassland restoration in the Badlands of North Dakota, USA. *Ecological*  
590 *Restoration* 37:123–130
- 591 Grman E, Bassett T, Brudvig LA (2013) EDITOR'S CHOICE: Confronting contingency in  
592 restoration: Management and site history determine outcomes of assembling prairies, but  
593 site characteristics and landscape context have little effect. *Journal of Applied Ecology*  
594 50:1234–1243
- 595 Hamilton J et al. (2020) Evolutionary approaches to seed sourcing for grassland restorations. *The*  
596 *New phytologist* 225:2246–2248
- 597 Hereford J (2009) A quantitative survey of local adaptation and fitness trade-offs. *American*  
598 *Naturalist* 173:579–588
- 599 Hoban S et al. (2016) Finding the genomic basis of local adaptation: Pitfalls, practical solutions,

- 600 and future directions. *American Naturalist* 188:379–397
- 601 Isbell F et al. (2015) Biodiversity increases the resistance of ecosystem productivity to climate  
602 extremes. *Nature* 526:574–577
- 603 Kaul AD, Wilsey BJ (2020) Exotic species drive patterns of plant species diversity in 93 restored  
604 tallgrass prairies. *Ecological Applications* 0–2
- 605 Kawecki TJ, Ebert D (2004) Conceptual issues in local adaptation. *Ecology Letters* 7:1225–1241
- 606 Kurtz, C. 2001. A practical guide to prairie reconstruction. University of Iowa Press, Iowa City.
- 607 Lauenroth WK, Adler PB (2008) Demography of perennial grassland plants: Survival, life  
608 expectancy and life span. *Journal of Ecology* 96:1023–1032
- 609 Leimu R et al. (2010) Habitat fragmentation, climate change, and inbreeding in plants. *Annals of*  
610 *the New York Academy of Sciences* 1195:84–98
- 611 Magurran, A.E. (2004). An index of diversity. *Measuring biological diversity*. 109–130.
- 612 Mangan ME et al. (2011) Native perennial grassland species for bioenergy: Establishment and  
613 biomass productivity. *Agronomy Journal* 103:509–519
- 614 Martin LM, Moloney KA, Wilsey BJ (2005) An assessment of grassland restoration success  
615 using species diversity components. *Journal of Applied Ecology* 42:327–336
- 616 Martin LM, Wilsey BJ (2014) Native-species seed additions do not shift restored prairie plant  
617 communities from exotic to native states. *Basic and Applied Ecology* 15:297–304
- 618 Martinez Arbizu, P. 2019. pairwiseAdonis: Pairwise Multilevel Comparison Using Adonis.  
619 Available online: <https://github.com/pmartinezarbizu/pairwiseAdonis> (accessed on 01  
620 December 2021).
- 621 McKay JK et al. (2005) ‘How local is local?’ - A review of practical and conceptual issues in the  
622 genetics of restoration. *Restoration Ecology* 13:432–440
- 623 McKenna TP et al. (2019) *Helianthus maximiliani* and species fine-scale spatial pattern affect  
624 diversity interactions in reconstructed tallgrass prairies. *Ecology and Evolution* 9:12171–  
625 12181
- 626 Montoya D, Rogers L, Memmott J (2012) Emerging perspectives in the restoration of  
627 biodiversity-based ecosystem services. *Trends in Ecology and Evolution* 27:666–672
- 628 Norland J et al. (2013) Reduced Establishment of Canada Thistle (*Cirsium arvense*) Using  
629 Functionally Similar Native Forbs. *Ecological Restoration* 31:143–146
- 630 Oakley CA, Knox JS (2013) Plant species richness increases resistance to invasion by non-  
631 resident plant species during grassland restoration. *Applied Vegetation Science* 16:21–28

- 632 Pizza R, Espeland E, Etterson J (2021) Eight generations of native seed cultivation reduces plant  
633 fitness relative to the wild progenitor population. *Evolutionary Applications* 14:1816–1829
- 634 Polley HW, Wilsey BJ, Derner JD (2003) Do species evenness and plant density influence the  
635 magnitude of selection and complementarity effects in annual plant species mixtures?  
636 *Ecology Letters* 6:248–256
- 637 Reed DH, Frankham R (2003) Correlation between fitness and genetic diversity. *Conservation*  
638 *Biology* 17:230–237
- 639 Ricklefs R (1977) Environmental Heterogeneity and Plant Species Diversity : A Hypothesis.  
640 *American Naturalist* 111:376–381
- 641 Rowe HI (2010) Tricks of the Trade: Techniques and Opinions from 38 Experts in Tallgrass  
642 Prairie Restoration. *Restoration Ecology* 18:253–262
- 643 Shaw N et al. (2020) Seed use in the field: delivering seeds for restoration success. *Restoration*  
644 *Ecology* 28:S276–S285
- 645 Smith, D. 2010. The Tallgrass Prairie Center guide to prairie restoration in the Upper Midwest.
- 646 Stevens MHH, Carson WP (2002) Resource quantity, not resource heterogeneity, maintains plant  
647 diversity. *Ecology Letters* 5:420–426
- 648 Stotz GC, Gianoli E, Cahill JF (2019) Biotic homogenization within and across eight widely  
649 distributed grasslands following invasion by *Bromus inermis*. *Ecology* 100:1–13
- 650 Tilman D et al. (2001) Diversity and productivity in a long-term grassland experiment. *Science*  
651 294:843–845
- 652 Tilman D et al. (1997) The influence of functional diversity and composition on ecosystem  
653 processes. *Science* 277:1300–1302
- 654 Tilman D, Wedin D, Knops J (1996) Productivity and sustainability influenced by biodiversity in  
655 grassland ecosystems. *Nature* 379:718–720
- 656 Wilson SD, Tilman D (1993) Plant Competition and Resource Availability in Response to  
657 Disturbance and Fertilization. *Ecology* 74:599–611
- 658 Yurkonis KA et al. (2012) Initial species pattern affects invasion resistance in experimental  
659 grassland plots. *Journal of Vegetation Science* 104:479–486
- 660
- 661

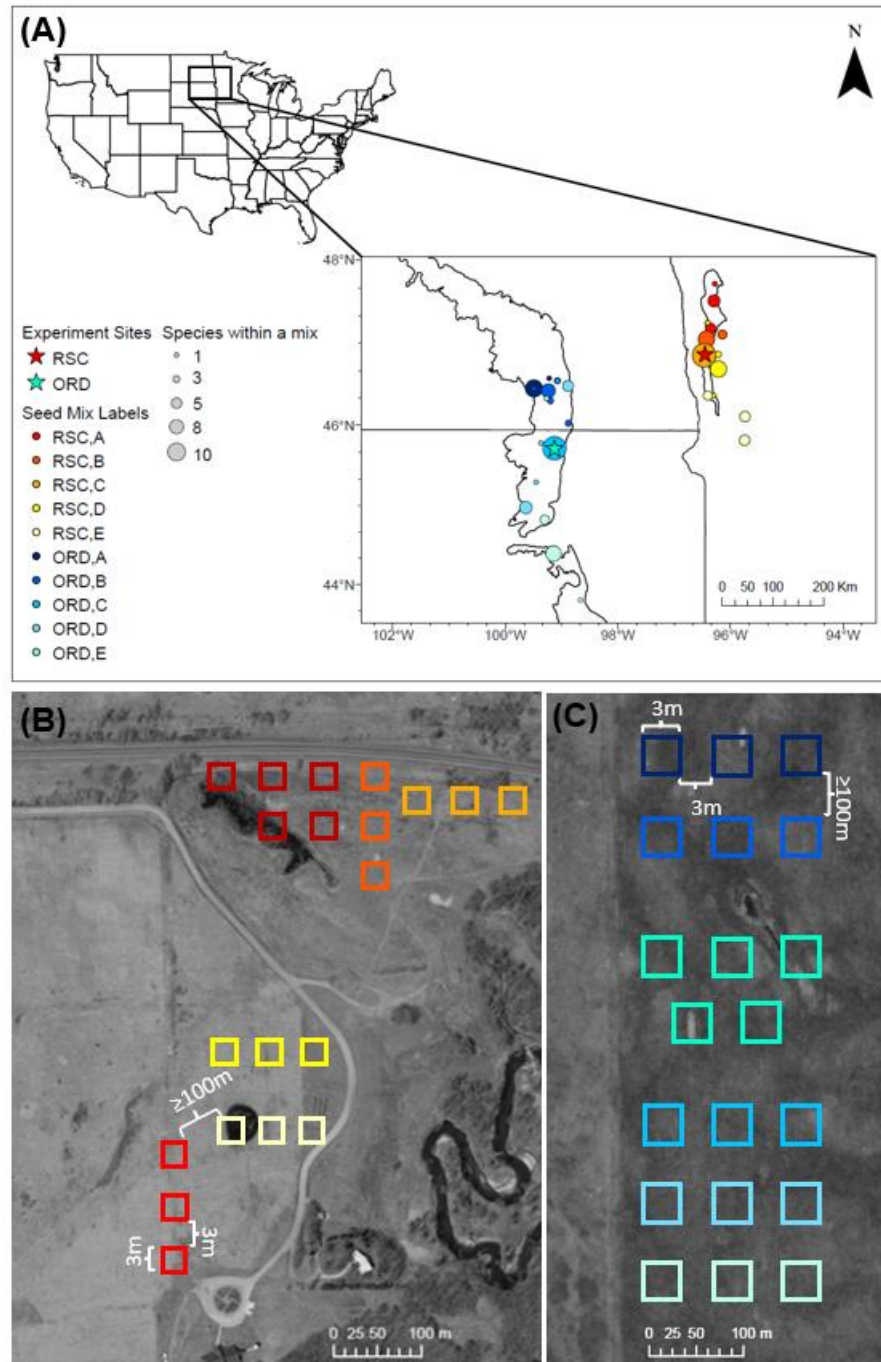

662

663 Fig. 1. A) Seed collection sites for seed mix treatments for Missouri Coteau (blues) and  
664 northwestern MN (reds) regions respectively. Colors represent individual seed mixes, and  
665 proportional symbols indicate the number of species sourced from a single site used within a seed  
666 mix. Stars indicate experimental site locations. B) Seed mix treatment layout at the RSC restoration  
667 site in Glyndon, MN. C) Seed mix treatment layout at ORD restoration site in Leola, SD. Colors  
668 correspond to seed treatment, single-source treatments include three replicate plots and the  
669 multiple-source treatment includes five replicate plots.

670

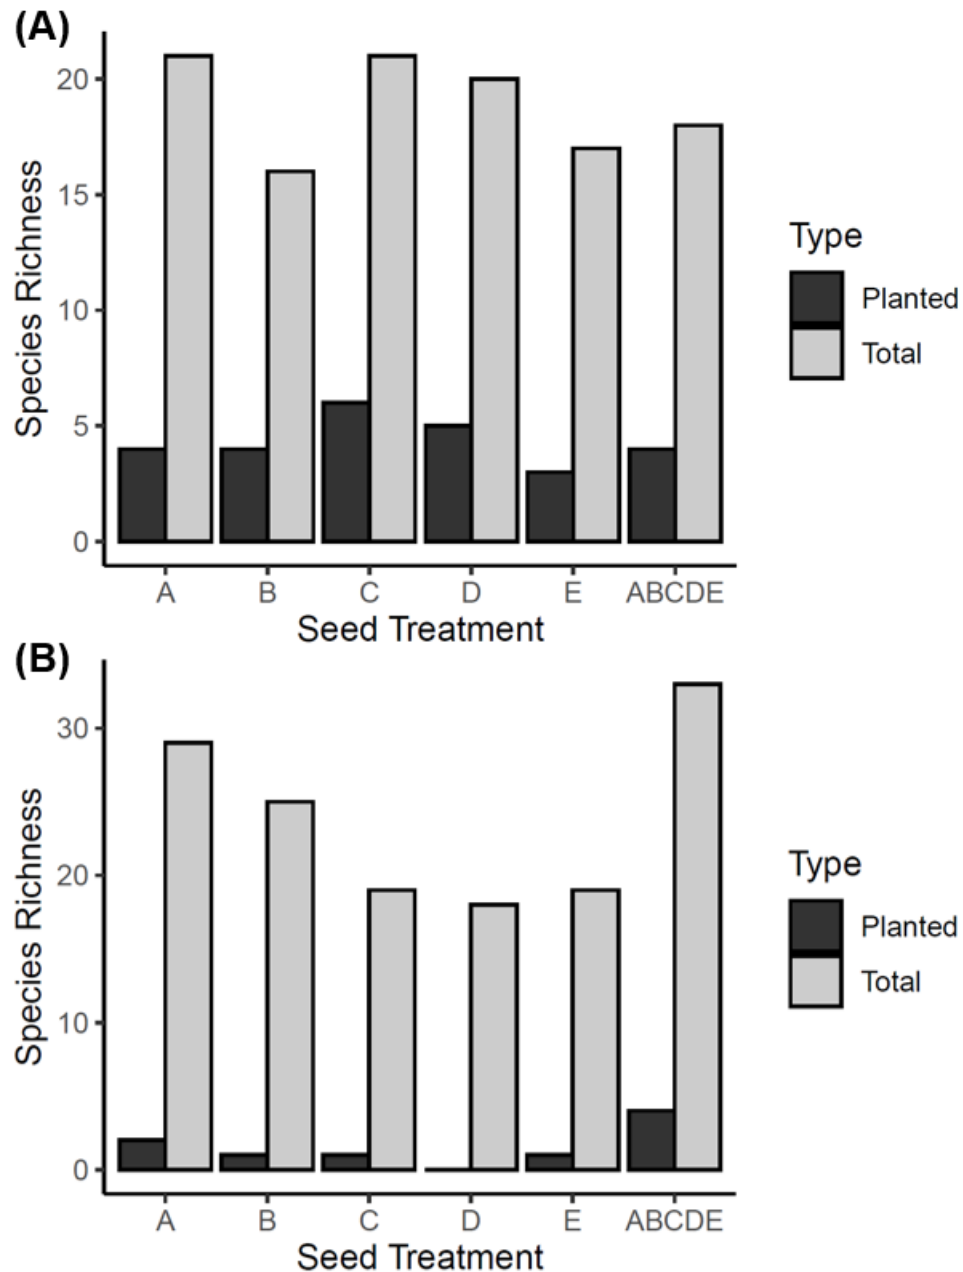

671

672 Fig. 2. Comparison of planted and total species richness within each seed mix treatment throughout  
673 June-September 2020 within the ORD experimental site (A) and RSC experimental site (B).  
674 Overall planted richness was greater in within all ORD seed treatments compared to RSC. Total  
675 species richness was higher in RSC than in ORD, and the multiple-source seed treatment, labeled  
676 ABCDE, had greatest planted species richness.

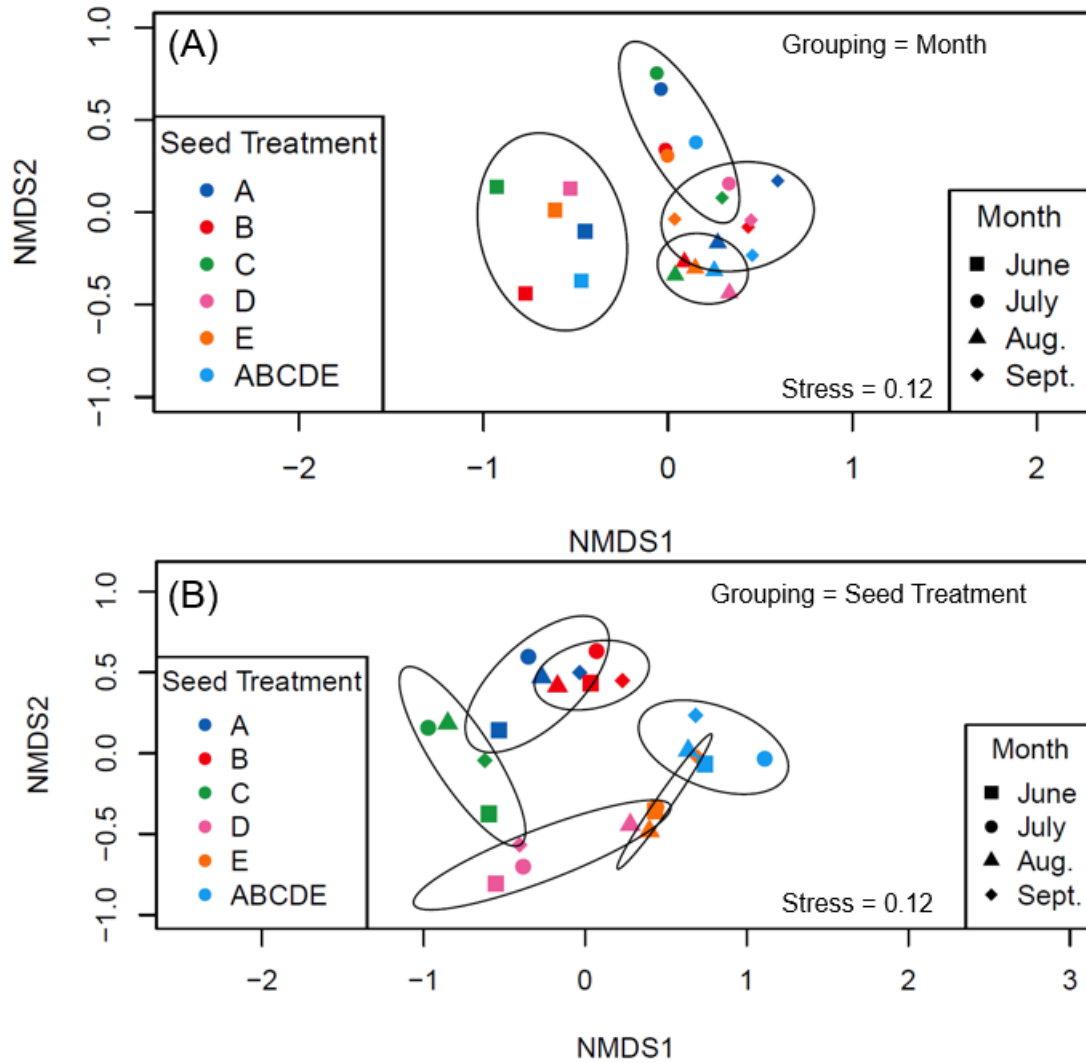

677

678 Fig. 3. Nonmetric Multidimensional Scaling with Bray – Curtis dissimilarity graphs of the first  
679 year established communities within (A) RSC communities grouped by seed treatment and (B)  
680 ORD communities grouped by month. Seed treatment indicated by color and shapes indicate  
681 month of data collection. Ellipses are 95% confidence intervals.

682

683

684

685



686 Table 1. Species used experimental restoration plots for RSC and ORD sites, weighed amounts used in individual seed mix treatments,  
 687 individual species composition within seed mixes, approximate seeds/m<sup>2</sup>, and seed viability included where applicable.

| Species Scientific Name        | RSC                            |                              |                                |                      |                 | ORD                            |                              |                                |                      |
|--------------------------------|--------------------------------|------------------------------|--------------------------------|----------------------|-----------------|--------------------------------|------------------------------|--------------------------------|----------------------|
|                                | Single-population Seed Mix (g) | Five-population Seed Mix (g) | Species composition in mix (%) | Seeds/m <sup>2</sup> | Viable Seed (%) | Single-population Seed Mix (g) | Five-population Seed Mix (g) | Species composition in mix (%) | Seeds/m <sup>2</sup> |
| <i>Amorpha canescens</i>       | 12.5                           | 2.5                          | 21.8                           | 784                  | 20              | 12.5                           | 2.5                          | 23.2                           | 784                  |
| <i>Anemone cylindrica</i>      | 7.5                            | 1.5                          | 13.1                           | 764                  | 82              | -                              | -                            | -                              | -                    |
| <i>Artemisia frigida</i>       | 0.5                            | 0.1                          | 0.9                            | 556                  | 62              | -                              | -                            | -                              | -                    |
| <i>Bouteloua curtipendula</i>  | 5.0                            | 1.0                          | 8.7                            | 233                  | -               | 1.5                            | 0.3                          | 2.8                            | 70                   |
| <i>Bouteloua gracilis</i>      | -                              | -                            | -                              | -                    | -               | 0.5                            | 0.1                          | 0.9                            | 78                   |
| <i>Dalea purpurea</i>          | 5.0                            | 1.0                          | 8.7                            | 353                  | -               | 5.0                            | 1.0                          | 9.3                            | 353                  |
| <i>Echinacea angustifolia</i>  | 8.0                            | 1.6                          | 13.9                           | 219                  | -               | 8.0                            | 1.6                          | 14.8                           | 219                  |
| <i>Geum triflorum</i>          | 1.3                            | 0.3                          | 2.2                            | 132                  | 47              | 8.5                            | 1.7                          | 15.8                           | 899                  |
| <i>Helianthus maximiliani</i>  | 1.3                            | 0.3                          | 2.2                            | 64                   | -               | 1.0                            | 0.2                          | 1.9                            | 51                   |
| <i>Helianthus pauciflorus</i>  | 2.0                            | 0.4                          | 3.5                            | 31                   | -               | 2.0                            | 0.4                          | 3.7                            | 31                   |
| <i>Hesperostipa comata</i>     | -                              | -                            | 1.5                            | -                    | -               | 0.6                            | 0.1                          | 1.2                            | 18                   |
| <i>Liatris punctata</i>        | 4.3                            | 0.9                          | 7.4                            | 117                  | -               | 1.0                            | 0.2                          | 6.5                            | 274                  |
| <i>Pediomelum argophyllum</i>  | 2.5                            | 0.5                          | 4.4                            | 88                   | -               | 3.5                            | 0.7                          | 1.9                            | 27                   |
| <i>Potentilla arguta</i>       | 1.5                            | 0.3                          | -                              | 1352                 | 88              | 1.3                            | 0.3                          | 6.5                            | 123                  |
| <i>Ratibida columnifera</i>    | -                              | -                            | 2.6                            | -                    | -               | 2.5                            | 0.5                          | 2.3                            | 1127                 |
| <i>Schizachyrium scoparium</i> | 2.8                            | 0.6                          | 4.8                            | 162                  | -               | -                              | -                            | 4.6                            | 412                  |
| <i>Solidago rigida</i>         | 2.5                            | 0.5                          | 4.4                            | 402                  | 54              | 2.5                            | 0.5                          | 4.6                            | 402                  |

688

689 Table 2. PERMANOVA results for community composition differences within RSC  
690 experimental seed mix treatments, using Seed Treatment, Plot Replicate, Month, and the  
691 interaction between seed treatment and month as main explanatory variables.

692

|                 | Df | SS     | MS    | Pseudo F | R2    | P     |
|-----------------|----|--------|-------|----------|-------|-------|
| Seed Treatment  | 5  | 1.475  | 0.295 | 18.268   | 0.323 | 0.001 |
| Plot Replicate  | 14 | 1.778  | 0.127 | 7.868    | 0.390 | 0.001 |
| Month           | 3  | 0.130  | 0.043 | 2.677    | 0.028 | 0.018 |
| Bare Ground     | 1  | 0.002  | 0.002 | 0.135    | 0.000 | 0.897 |
| Thatch          | 1  | 0.007  | 0.007 | 0.408    | 0.001 | 0.640 |
| Treatment:Month | 15 | 0.526  | 0.035 | 2.172    | 0.115 | 0.008 |
| Residuals       | 40 | 0.646  | 0.016 |          | 0.142 |       |
| Total           | 79 | 4.5627 |       |          | 1     |       |

693

694

695 Table 3. PERMANOVA results for community composition differences within ORD  
696 experimental seed mix treatments, using Seed Treatment, Plot Replicate, Month, and the  
697 interaction between seed treatment and month as main explanatory variables.

|                 | Df | SS    | MS    | Pseudo F | R2    | P     |
|-----------------|----|-------|-------|----------|-------|-------|
| Seed Treatment  | 5  | 0.181 | 0.036 | 2.165    | 0.077 | 0.068 |
| PlotRep         | 14 | 0.228 | 0.016 | 0.975    | 0.097 | 0.509 |
| Month           | 3  | 0.908 | 0.303 | 18.095   | 0.385 | 0.001 |
| Bare Ground     | 1  | 0.018 | 0.018 | 1.079    | 0.008 | 0.314 |
| Thatch          | 1  | 0.001 | 0.001 | 0.061    | 0.000 | 0.928 |
| Treatment:Month | 15 | 0.352 | 0.023 | 1.401    | 0.149 | 0.157 |
| Residuals       | 40 | 0.669 | 0.017 | 0.284    |       |       |
| Total           | 79 | 2.358 | 1.000 |          |       |       |

698
